# Supplementary material for: Comparison of the therapeutic effects of unilateral biportal endoscopic discectomy and percutaneous endoscopic interlaminar discectomy in the treatment of lumbar disc herniation
Source: Research Square preprint supplement (doi:10.21203/rs.3.rs-6338564/v1), 2025-04-02
Supplement: Supplementary file 1 [file e20c07c7b3a65e47c17326e3.docx]

**Funding**

No benefits in any form have been received or will be received from a commercial party related directly or indirectly to the subject of this article. This work was supported by Weifang Young Medical Talent Support Project (WWZ2024113)，Weifang Municipal Health Commission Scientific Research Fund Project (WFWSJK-2024-008)

**Author contributions**

Conception and design: Cheng-Zhou Liu ,Wei Zhang ,Ting Wang. Acquisition of data: Cheng-Zhou Liu ,Wei Zhang ,Ting Wang. Analysis and interpretation of data: Cheng-Zhou Liu ,Wei Zhang ,Ting Wang. Drafting the article: Cheng-Zhou Liu, Bao-Xin Jia Critically revising the article: Wei Zhang, Ting Wang, Bao-Xin Jia. Reviewed submitted version of manuscript: Wei Zhang ,Ting Wang, Bao-Xin Jia. Approved the final version of the manuscript on behalf of all authors: Cheng-Zhou Liu. Statistical analysis: Cheng-Zhou Liu. Administrative/technical/material support: Cheng-Zhou Liu ,Cheng-Yue Zhu ,Feng Shen. Study supervision: Cheng-Yue Zhu ,Feng Shen.

**Corresponding author**

Wang Ting

**Ethics declarations**

**Ethics approval**

Ethical approval was obtained by hospital's Ethics Review Committee (M0052-2024) and the study was conducted in accordance with the Helsinki Declaration of 1975, as revised in 2013. Informed consent was obtained from all participating patients.

**Consent to participate**

Informed consent was obtained from all participants included in the study.

**Consent for publication**

The authors affirm that human research participants provided informed consent for publication of their individual data.

**Competing interests**

The authors declare no competing interests.
